# Supplementary material for: Synthesis and biological evaluation of ruthenium polypyridine complexes with 18β-glycyrrhetinic acid as antibacterial agents against Staphylococcus aureus
Source: Royal Society of Chemistry journal article supplement (doi:10.1039/d1dt02692e), 2021-12-02
Supplement: d1dt02692e1.pdf [file d1dt02692e1.pdf]

## Supplementary data

### Synthesis and biological evaluation of ruthenium polypyridine complexes with 18 $\beta$ -glycyrrhetic acid as antibacterial agents against *Staphylococcus aureus*

Qin Zhang,<sup>a</sup> Yanshi Xiong,<sup>a</sup> Jianxin Cheng,<sup>a</sup> Yanhui Tan,<sup>b</sup> Xiangwen Liao\*<sup>a</sup> and Jintao Wang\*<sup>a</sup>

<sup>a</sup>Jiangxi Provincial Key Laboratory of Drug Design and Evaluation, School of Pharmacy, Jiangxi Science & Technology Normal University, Nanchang, 330013, People's Republic of China. E-mail address: E-mail address: liao492008522@163.com or jintaochem@163.com

<sup>b</sup>State Key Laboratory for Chemistry and Molecular Engineering of Medicinal Resources, School of Chemistry and Pharmaceutical Sciences, Guangxi Normal University, Guilin, 541004, People's Republic of China.

### List of contents

|                                                                                                                       |        |
|-----------------------------------------------------------------------------------------------------------------------|--------|
| The synthetic route of ligand and ruthenium complexes .....                                                           | S1     |
| Distribution coefficients of complexes and GA .....                                                                   | S2     |
| Time-kill kinetics of <b>Ru2</b> against <i>S. aureus</i> .....                                                       | S3     |
| <sup>1</sup> H NMR, <sup>13</sup> C NMR and HRMS for the target ligands and the complexes<br>( <b>Ru1-Ru4</b> ) ..... | S4-S23 |

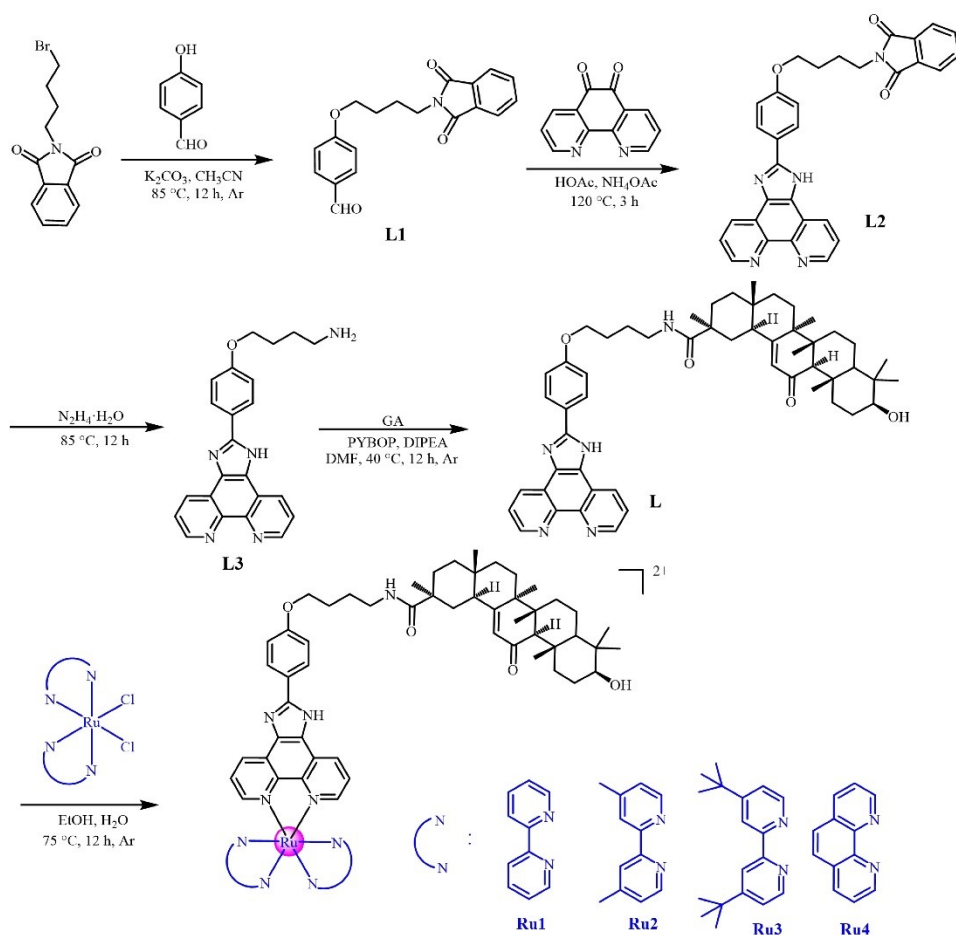

Fig. S1 The synthetic route of ligand and ruthenium complexes.

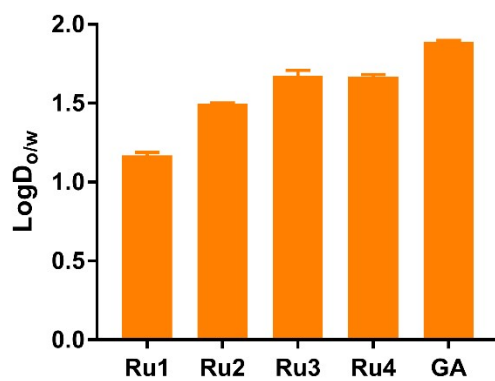

Fig. S2 Distribution coefficients of complexes and GA in an n-octanol/buffer mixture.

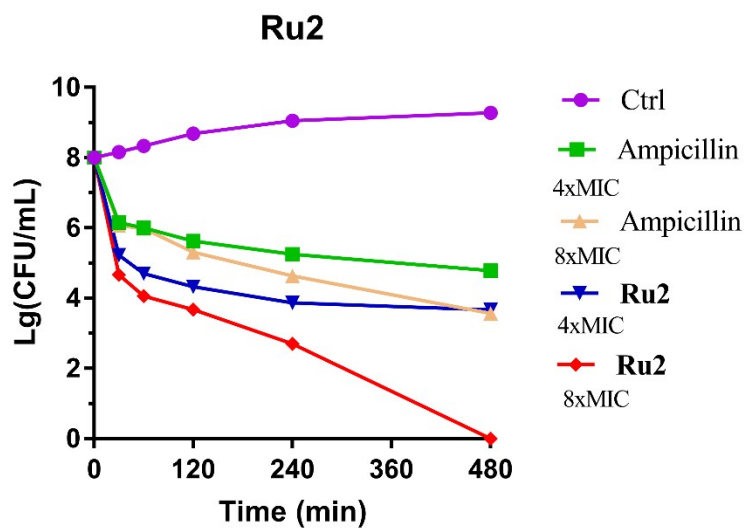

Fig. S3 Time-kill kinetics of **Ru2** against *S. aureus*.

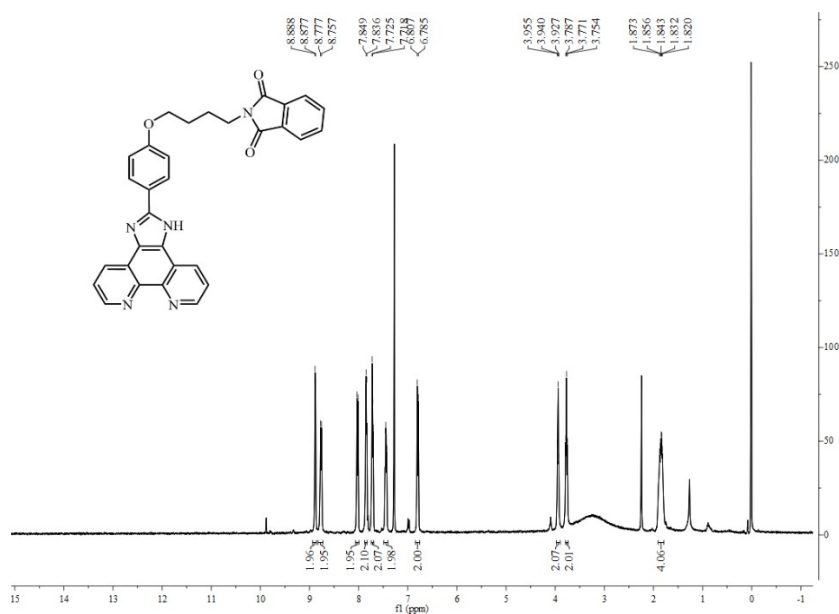

Fig. S4 <sup>1</sup>H NMR of L2.



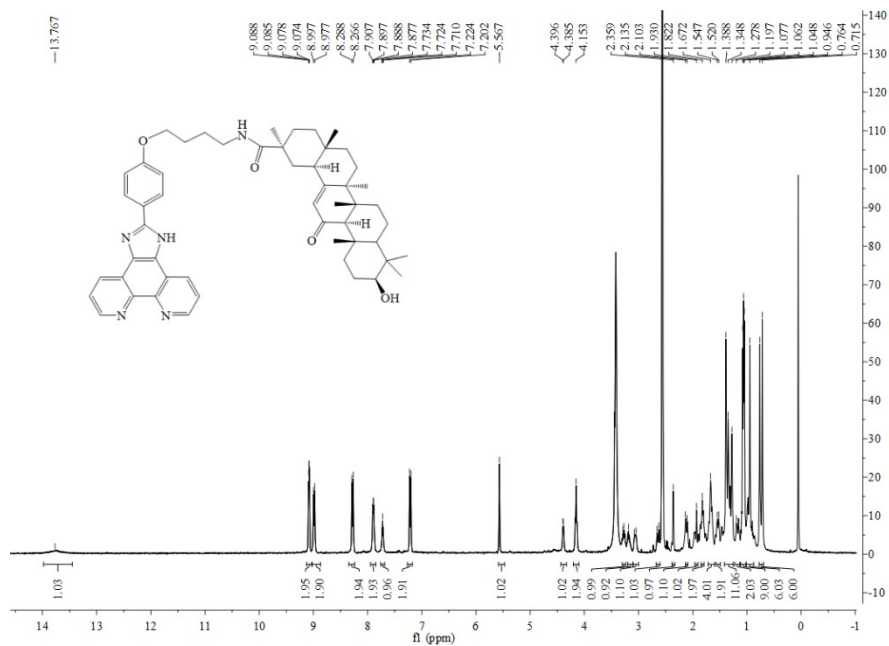

Fig. S7  $^1\text{H}$  NMR of L.

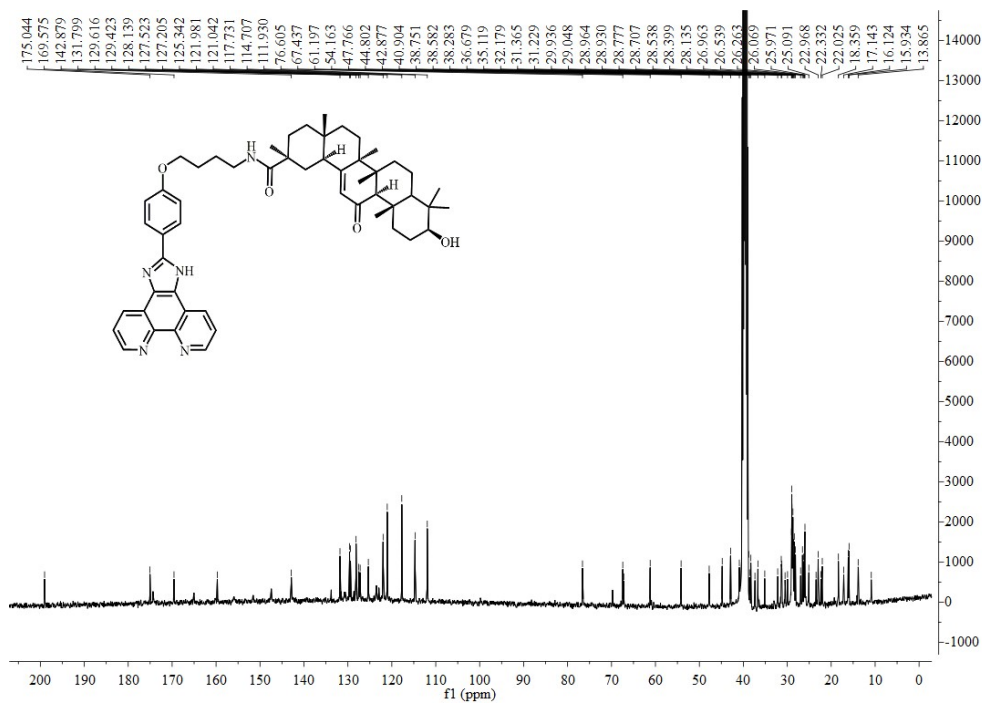

Fig. S8  $^{13}\text{C}$  NMR of L.

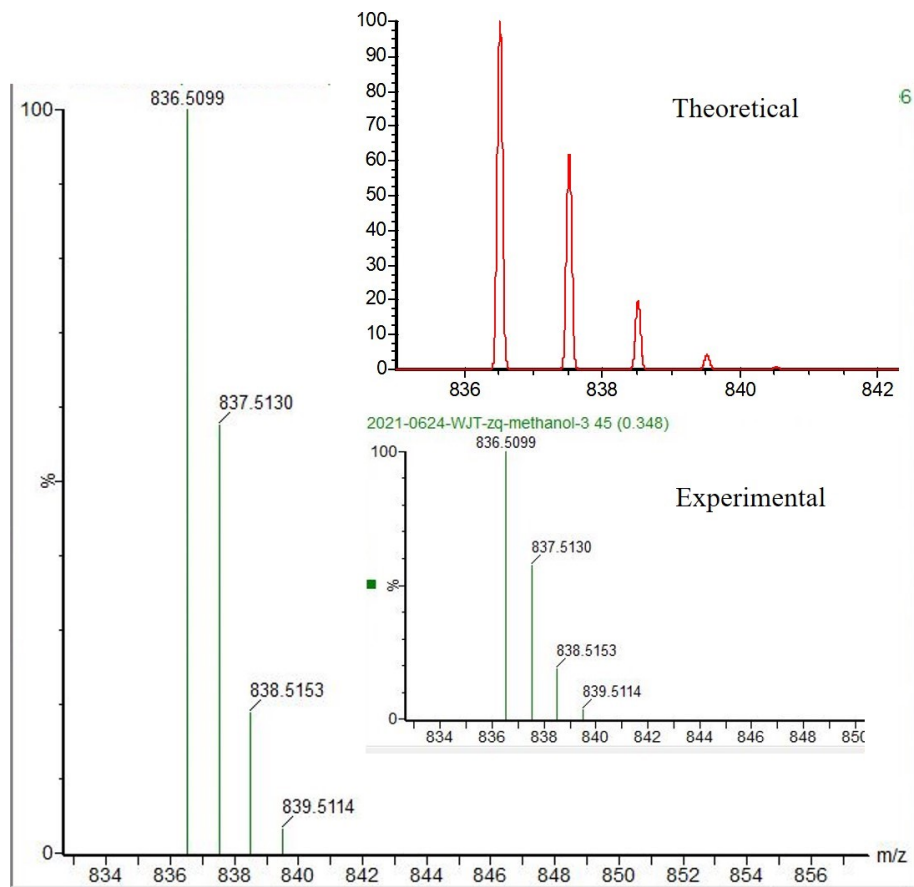

Fig. S9 HRMS of L.

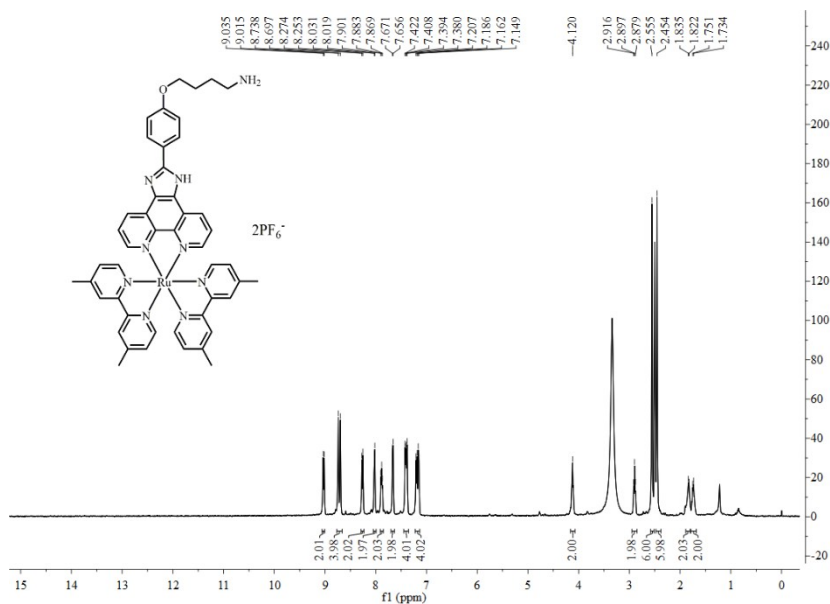

Fig. S10 <sup>1</sup>H NMR of Ru0.

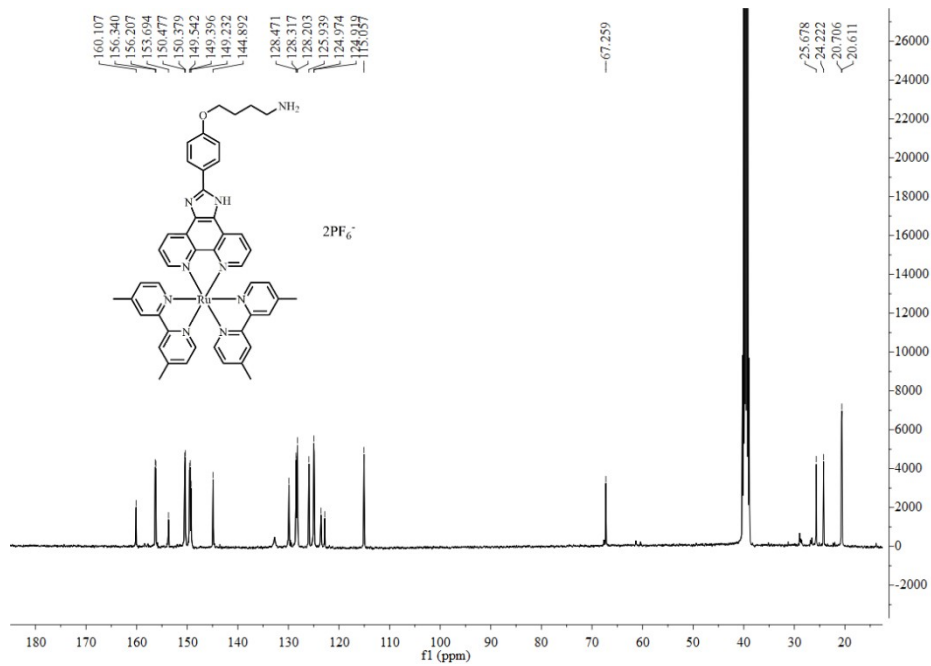

Fig. S11  $^{13}\text{C}$  NMR of Ru0.

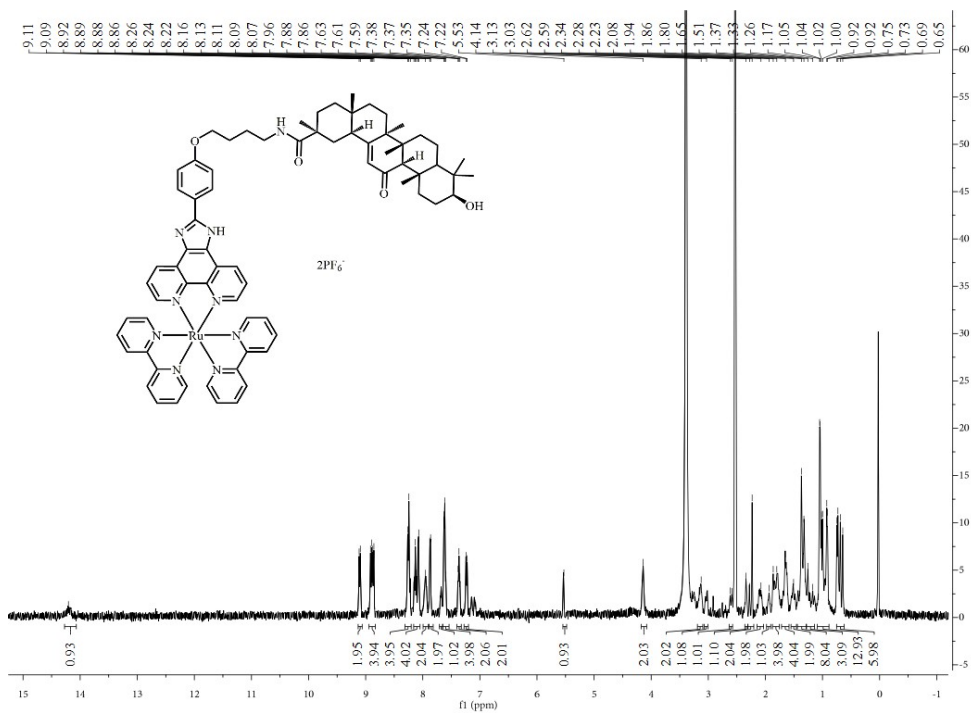

Fig. S12  $^1\text{H}$  NMR of Ru1.

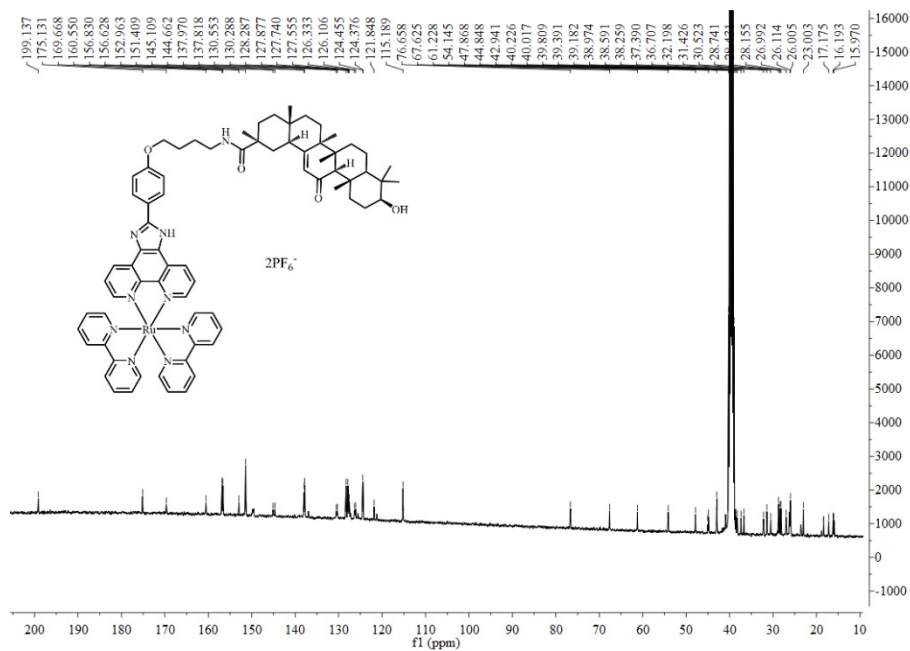

Fig. S13  $^{13}\text{C}$  NMR of Ru1.

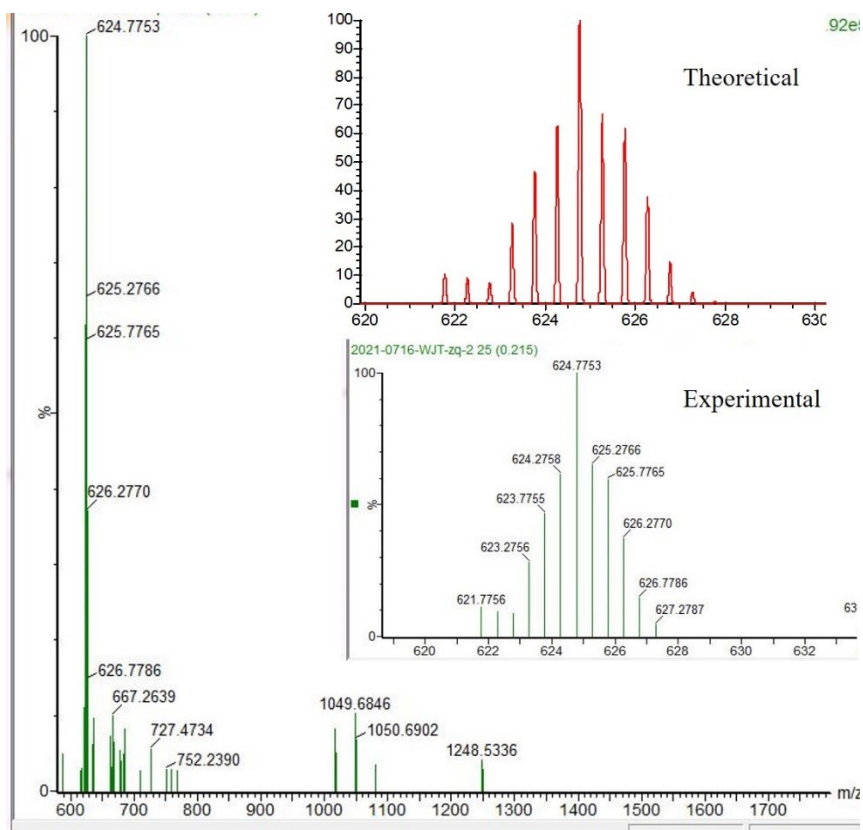

Fig. 14 HRMS of Ru1.



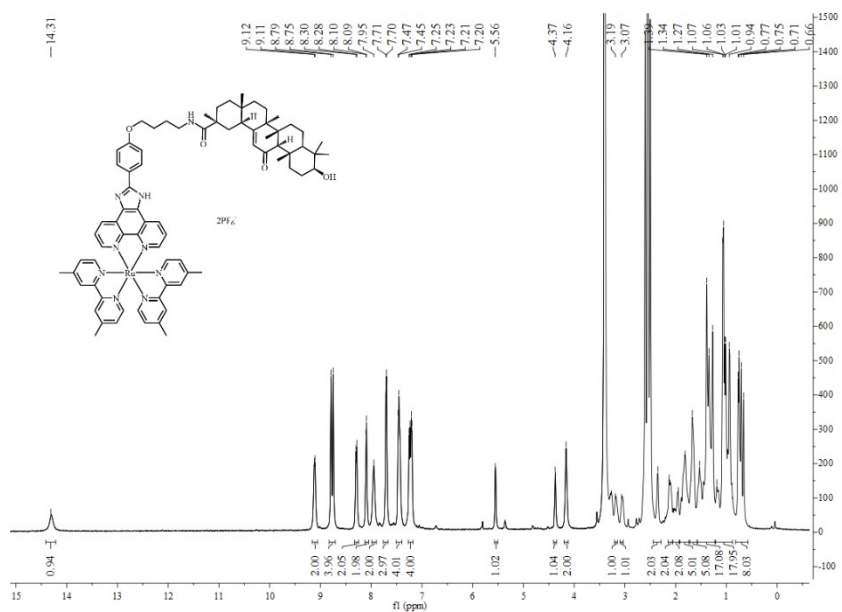

Fig. S15  $^1\text{H}$  NMR of Ru2.

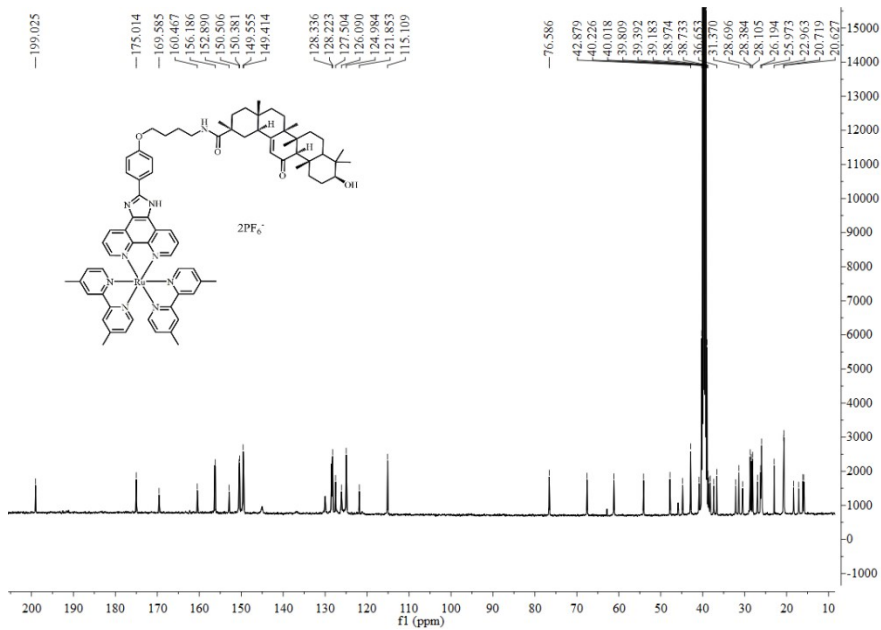

Fig. S16  $^{13}\text{C}$  NMR of Ru2.

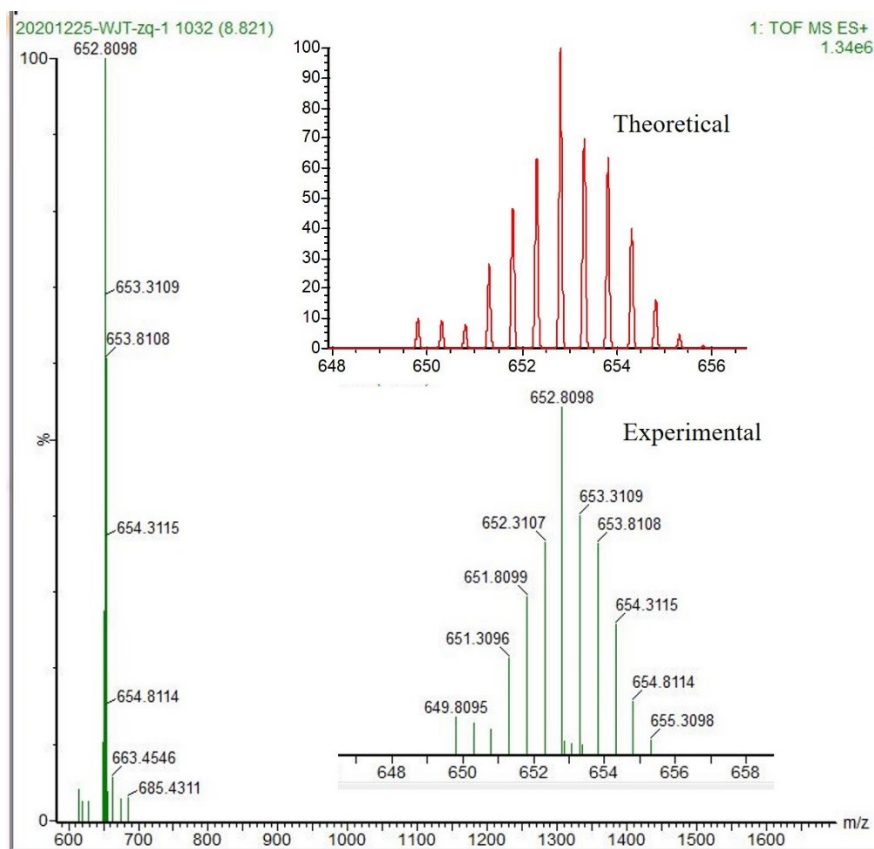

Fig. S17 HRMS of Ru2.

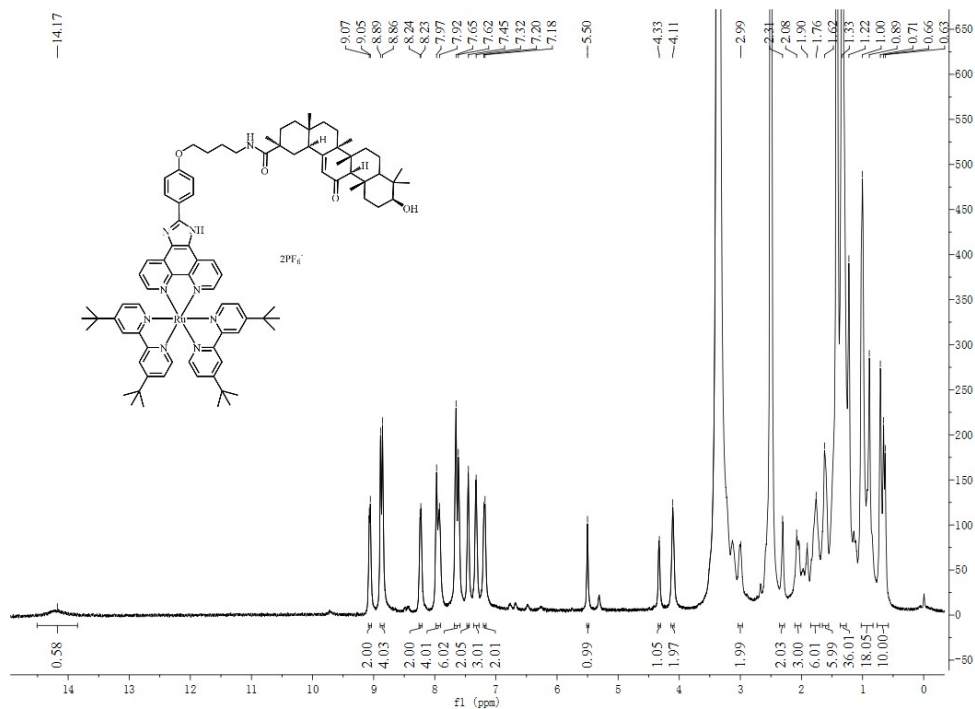

Fig. S18 <sup>1</sup>H NMR of Ru3.

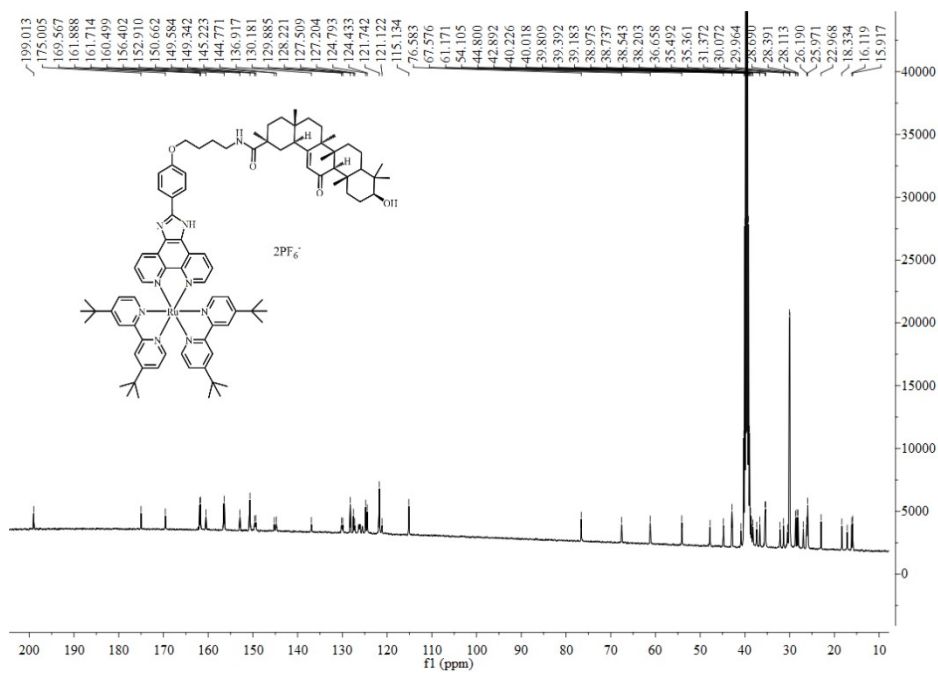

Fig. S19 <sup>13</sup>C NMR of Ru3.

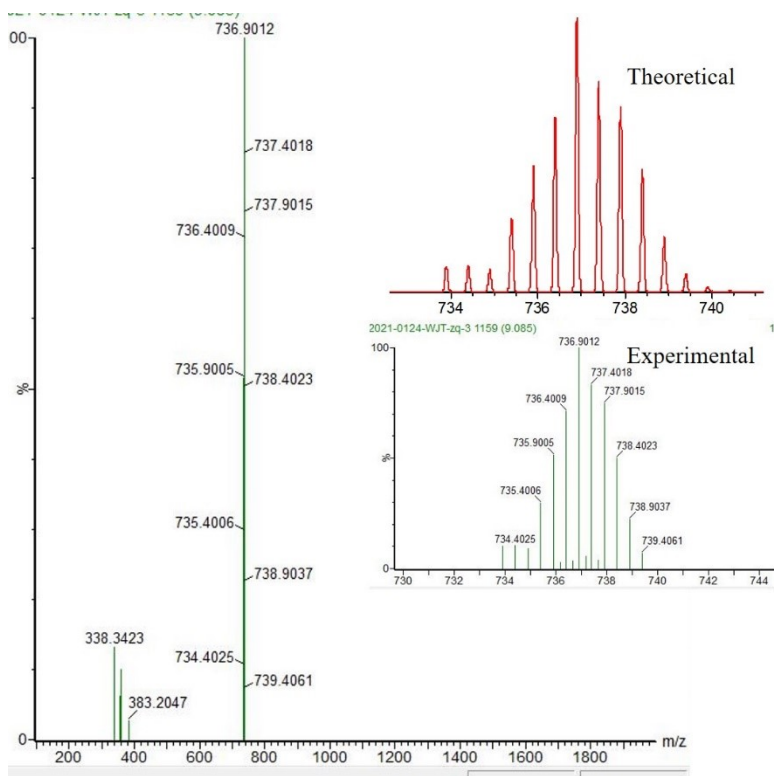

Fig. S20 HRMS of Ru3.

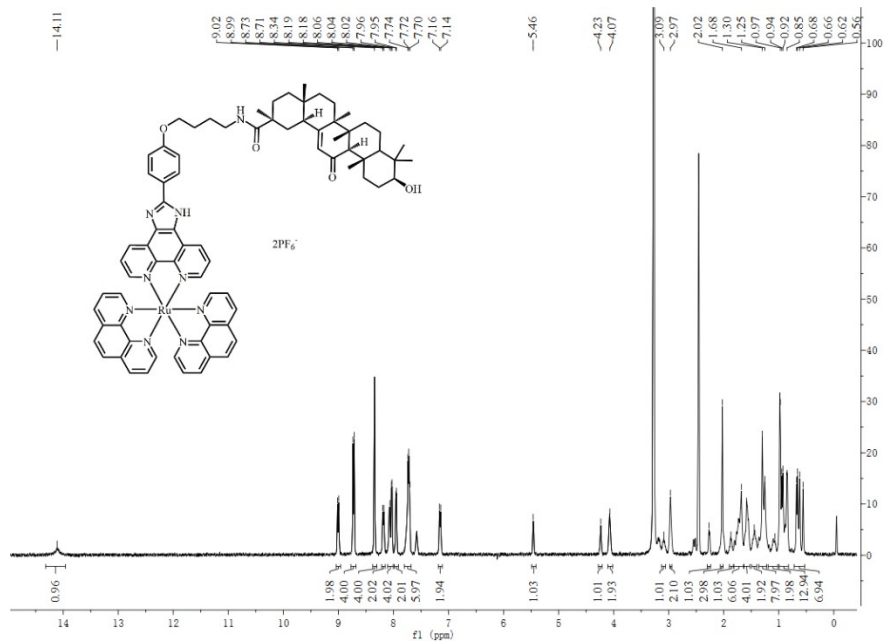

Fig. S21  $^1\text{H NMR}$  of Ru4.

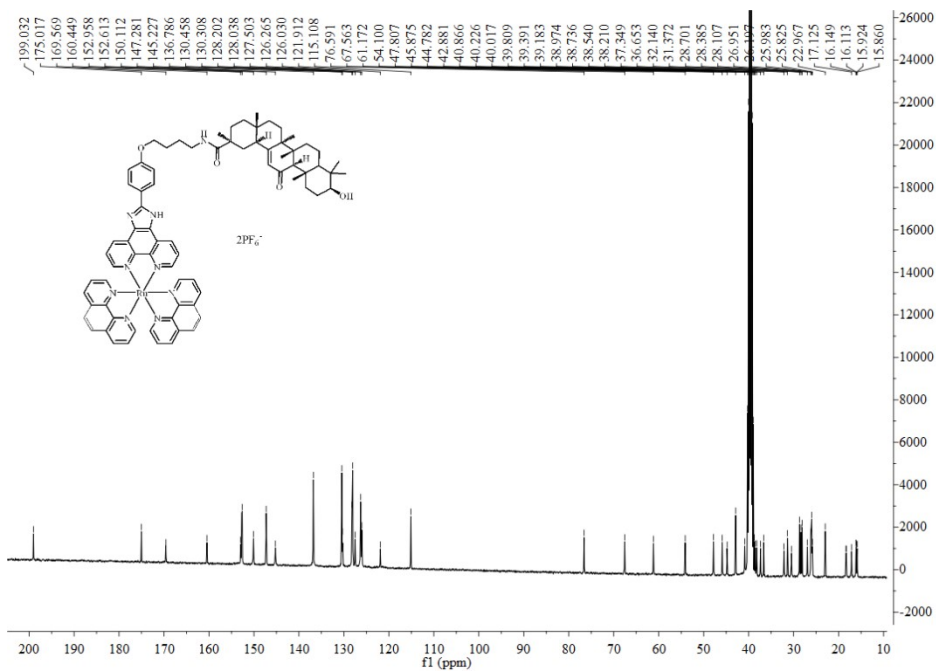

Fig. S22  $^{13}\text{C NMR}$  of Ru4.

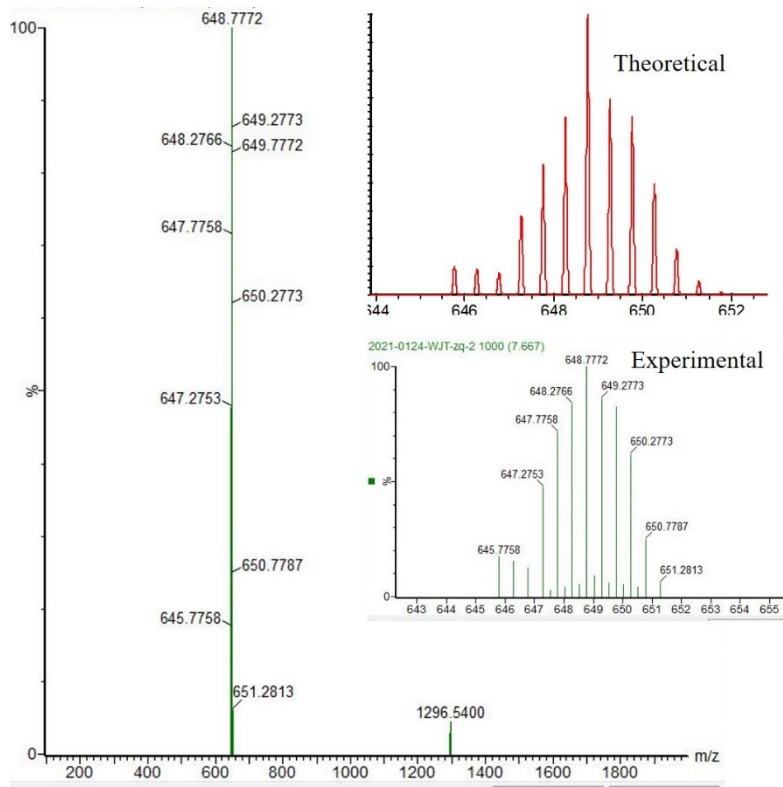

Fig. S23 HRMS of Ru4.
